# Supplementary material
Source: PubMed Central journal article supplement (PMC2805041)
Supplement: NIHMS165447-supplement-Supp_Info.pdf [file NIHMS165447-supplement-Supp_Info.pdf]

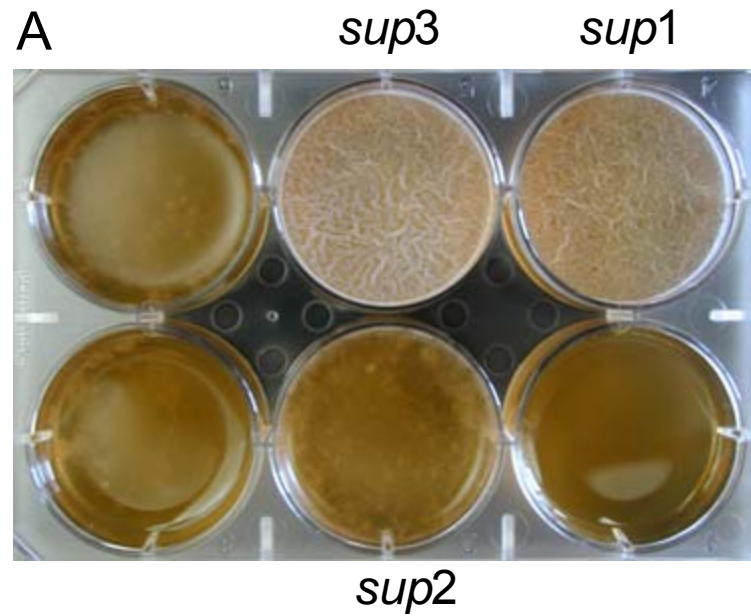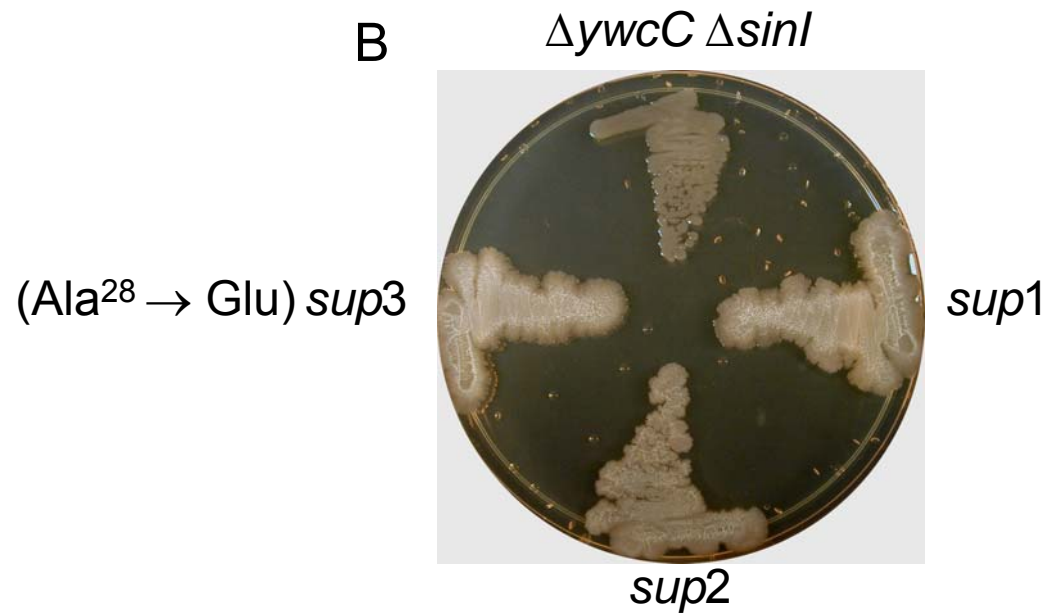

Figure S1

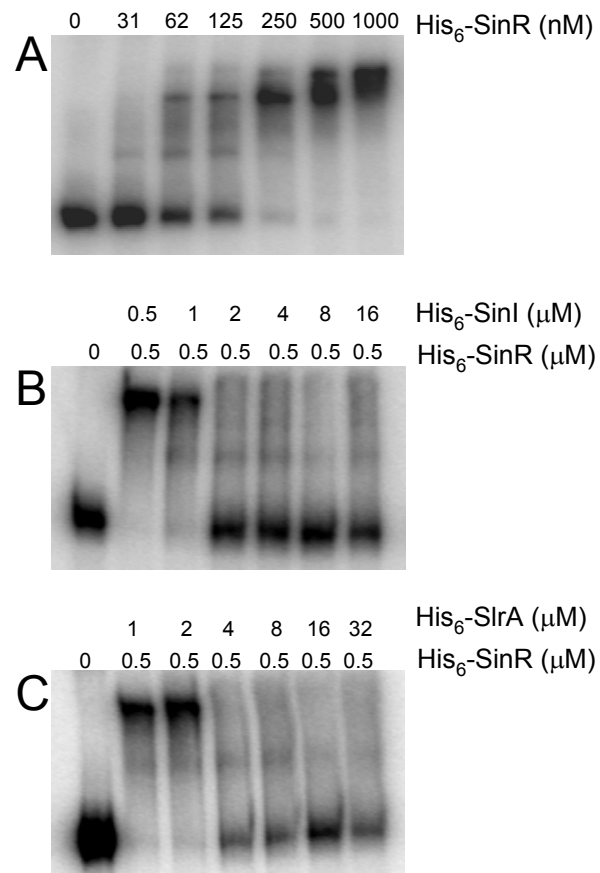

Figure S2

**Supplemental figure legends:**

**Figure S1.** (A) In six independent inoculations of the  $\Delta ywcC \Delta sinI$  cells in 2X SGG medium, three out of six (*sup1*, *sup2*, *sup3*) cultures showed or began to show robust pellicle formation after three days of incubation at 23°C. (B) All three cultures contained suppressor mutants that are different from the parent strain and form robust biofilms. One such suppressor mutant (*sup3*) acquired a mutation that was mapped to the *sinR* gene as a missense mutation (Ala<sup>28</sup> → Glu).

**Figure S2.** SlrA inhibits SinR from binding to DNA in EMSA (A) His<sub>6</sub>-SinR bound to and shifted the promoter sequence of the *epsA-O* operon in a concentration dependent manner. Increasing amounts of His<sub>6</sub>-SinI (as indicated in panel B) or His<sub>6</sub>-SlrA (as indicated in panel C) were mixed with a fixed amount of His-SinR (0.5 μM) in EMSA. Note that the His-tagged SinI (and we presume the His-tagged SlrA) was less potent than the purified untagged SinI used in our previous EMSA experiments [Kearns et al (2005)].

## **Supplemental experimental procedures:**

### **Electrophoretic mobility shift assay (EMSA)**

Proteins were purified as described above. The DNA probe for the promoter sequence of the *eps* operon was generated by PCR using chromosomal DNA from 3610 and the primers P<sub>*epsA*</sub>-F1 and P<sub>*epsA*</sub>-R1 (Table S2). The DNA probe was digested with EcoRI, gel purified, and filled-in using klenow (*exo*<sup>-</sup>), dTTP, and [ $\alpha$ -<sup>32</sup>P]-dATP (NEB). EMSA was conducted following a protocol that has been described previously (Kearns et al., 2005).

**Table S1. Strains used in this study.**

---

|                    |                                                                                                                                                                                                             |                               |
|--------------------|-------------------------------------------------------------------------------------------------------------------------------------------------------------------------------------------------------------|-------------------------------|
| <i>E. coli</i>     |                                                                                                                                                                                                             |                               |
| DH5 $\alpha$       | an <i>E. coli</i> strain used for molecular cloning                                                                                                                                                         | Invitrogen                    |
| BL21/DE3           | <i>E. coli</i> B F <sup>-</sup> <i>dcm ompT hsdS</i> (r <sub>B</sub> <sup>-</sup> m <sub>B</sub> <sup>-</sup> ) <i>gal</i> $\lambda$ (DE3)                                                                  | Stratagene                    |
| FC595              | a BL21/DE3 derivative for overexpression of GST-SlrR, Cm <sup>R</sup> , Amp <sup>R</sup>                                                                                                                    | (FC, unpublished)             |
| RL4219             | a BL21/DE3 derivative for overexpression of His <sub>6</sub> -SinI, Cm <sup>R</sup> , Kan <sup>R</sup>                                                                                                      | (Kearns <i>et al.</i> , 2005) |
| RL4220             | a BL21/DE3 derivative for overexpression of His <sub>6</sub> -SinR, Cm <sup>R</sup> , Kan <sup>R</sup>                                                                                                      | (Kearns <i>et al.</i> , 2005) |
| YC388              | a BL21/DE3 derivative for overexpression of His <sub>6</sub> -SlrA, Kan <sup>R</sup>                                                                                                                        | this work                     |
| <br>               |                                                                                                                                                                                                             |                               |
| <i>B. subtilis</i> |                                                                                                                                                                                                             |                               |
| PY79               | laboratory strain used as a host for transformation                                                                                                                                                         |                               |
| 3610               | undomesticated wild strain capable of forming robust biofilms                                                                                                                                               | (Branda <i>et al.</i> , 2001) |
| RL3856             | $\Delta$ <i>sinR</i> , $\Delta$ <i>epsH</i> in 3610, Spc <sup>R</sup> , Tet <sup>R</sup>                                                                                                                    | (Kearns <i>et al.</i> , 2005) |
| FC134              | <i>amyE</i> ::P <sub><i>yqxM</i></sub> - <i>lacZ</i> , $\Delta$ <i>epsH</i> in 3610, Cm <sup>R</sup> , Tet <sup>R</sup>                                                                                     | (Chu <i>et al.</i> , 2008)    |
| FC135              | <i>amyE</i> ::P <sub><i>yqxM</i></sub> - <i>lacZ</i> , $\Delta$ <i>sinR</i> , $\Delta$ <i>epsH</i> in 3610, Cm <sup>R</sup> , Spc <sup>R</sup> , Tet <sup>R</sup>                                           | (Chu <i>et al.</i> , 2008)    |
| YC122              | <i>amyE</i> ::P <sub><i>slrR</i></sub> - <i>lacZ</i> in 3610, Cm <sup>R</sup>                                                                                                                               | this work                     |
| YC130              | <i>amyE</i> ::P <sub><i>epsA</i></sub> - <i>lacZ</i> in 3610, Cm <sup>R</sup>                                                                                                                               | (Chai <i>et al.</i> , 2008)   |
| YC131              | $\Delta$ <i>slrR</i> in 3610, Spc <sup>R</sup>                                                                                                                                                              | this work                     |
| YC132              | <i>amyE</i> ::P <sub><i>epsA</i></sub> - <i>lacZ</i> , $\Delta$ <i>slrR</i> in 3610, Cm <sup>R</sup> , Spc <sup>R</sup>                                                                                     | this work                     |
| YC133              | <i>amyE</i> ::P <sub><i>epsA</i></sub> - <i>lacZ</i> , $\Delta$ <i>sinR</i> , $\Delta$ <i>epsH</i> in 3610, Cm <sup>R</sup> , Spc <sup>R</sup> , Tet <sup>R</sup>                                           | this work                     |
| YC148              | <i>amyE</i> ::P <sub><i>slrR</i></sub> - <i>lacZ</i> , $\Delta$ <i>slrR</i> in 3610, Cm <sup>R</sup> , Spc <sup>R</sup>                                                                                     | this work                     |
| YC189              | <i>amyE</i> ::P <sub><i>yqxM</i></sub> - <i>cfp</i> in 3610, Spc <sup>R</sup>                                                                                                                               | (Chai <i>et al.</i> , 2008)   |
| YC274              | <i>amyE</i> ::P <sub><i>yqxM</i></sub> - <i>lacZ</i> , $\Delta$ <i>slrR</i> in 3610, Spc <sup>R</sup> , Tet <sup>R</sup>                                                                                    | this work                     |
| YC294              | $\Delta$ <i>slrA</i> in 3610, Kan <sup>R</sup>                                                                                                                                                              | this work                     |
| YC295              | $\Delta$ <i>ywcC</i> in 3610, Kan <sup>R</sup>                                                                                                                                                              | this work                     |
| YC296              | $\Delta$ <i>ywcC</i> - <i>slrA</i> in 3610, Kan <sup>R</sup>                                                                                                                                                | this work                     |
| YC297              | $\Delta$ <i>ywcC</i> , $\Delta$ <i>slrR</i> in 3610, Kan <sup>R</sup> , Spc <sup>R</sup>                                                                                                                    | this work                     |
| YC298              | $\Delta$ <i>ywcC</i> , $\Delta$ <i>sinI</i> in 3610, Kan <sup>R</sup> , Spc <sup>R</sup>                                                                                                                    | this work                     |
| YC501              | <i>amyE</i> ::P <sub><i>yqxM</i></sub> - <i>lacZ</i> , $\Delta$ <i>slrA</i> in 3610, Cm <sup>R</sup> , Kan <sup>R</sup>                                                                                     | this work                     |
| YC502              | <i>amyE</i> ::P <sub><i>epsA</i></sub> - <i>lacZ</i> , $\Delta$ <i>slrA</i> in 3610, Cm <sup>R</sup> , Kan <sup>R</sup>                                                                                     | this work                     |
| YC503              | <i>amyE</i> ::P <sub><i>slrR</i></sub> - <i>lacZ</i> , $\Delta$ <i>slrA</i> in 3610, Cm <sup>R</sup> , Kan <sup>R</sup>                                                                                     | this work                     |
| YC505              | <i>amyE</i> ::P <sub><i>yqxM</i></sub> - <i>lacZ</i> , $\Delta$ <i>ywcC</i> , $\Delta$ <i>epsH</i> in 3610, Cm <sup>R</sup> , Kan <sup>R</sup> , Tet <sup>R</sup>                                           | this work                     |
| YC506              | <i>amyE</i> ::P <sub><i>epsA</i></sub> - <i>lacZ</i> , $\Delta$ <i>ywcC</i> , $\Delta$ <i>epsH</i> in 3610, Cm <sup>R</sup> , Kan <sup>R</sup> , Tet <sup>R</sup>                                           | this work                     |
| YC507              | <i>amyE</i> ::P <sub><i>slrR</i></sub> - <i>lacZ</i> , $\Delta$ <i>ywcC</i> , $\Delta$ <i>epsH</i> in 3610, Cm <sup>R</sup> , Kan <sup>R</sup> , Tet <sup>R</sup>                                           | this work                     |
| YC509              | <i>amyE</i> ::P <sub><i>yqxM</i></sub> - <i>lacZ</i> , $\Delta$ <i>ywcC</i> - <i>slrA</i> in 3610, Cm <sup>R</sup> , Kan <sup>R</sup>                                                                       | this work                     |
| YC510              | <i>amyE</i> ::P <sub><i>epsA</i></sub> - <i>lacZ</i> , $\Delta$ <i>ywcC</i> - <i>slrA</i> in 3610, Cm <sup>R</sup> , Kan <sup>R</sup>                                                                       | this work                     |
| YC517              | <i>amyE</i> ::P <sub><i>yqxM</i></sub> - <i>lacZ</i> , $\Delta$ <i>ywcC</i> , $\Delta$ <i>slrR</i> in 3610, Cm <sup>R</sup> , Kan <sup>R</sup> , Mls <sup>R</sup>                                           | this work                     |
| YC518              | <i>amyE</i> ::P <sub><i>epsA</i></sub> - <i>lacZ</i> , $\Delta$ <i>ywcC</i> , $\Delta$ <i>slrR</i> in 3610, Cm <sup>R</sup> , Kan <sup>R</sup> , Mls <sup>R</sup>                                           | this work                     |
| YC519              | <i>amyE</i> ::P <sub><i>slrR</i></sub> - <i>lacZ</i> , $\Delta$ <i>ywcC</i> , $\Delta$ <i>slrR</i> , $\Delta$ <i>epsH</i> in 3610, Cm <sup>R</sup> , Kan <sup>R</sup> , Spc <sup>R</sup> , Tet <sup>R</sup> | this work                     |
| YC526              | <i>amyE</i> ::P <sub><i>slrA</i></sub> - <i>lacZ</i> , $\Delta$ <i>epsH</i> in 3610, Cm <sup>R</sup> , Tet <sup>R</sup>                                                                                     | this work                     |
| YC527              | <i>amyE</i> ::P <sub><i>slrA</i></sub> - <i>lacZ</i> , $\Delta$ <i>ywcC</i> , $\Delta$ <i>epsH</i> in 3610, Cm <sup>R</sup> , Kan <sup>R</sup> , Tet <sup>R</sup>                                           | this work                     |
| YC528              | <i>amyE</i> ::P <sub><i>yqxM</i></sub> - <i>lacZ</i> , $\Delta$ <i>slrR</i> , $\Delta$ <i>epsH</i> in 3610, Cm <sup>R</sup> , Mls <sup>R</sup> , Tet <sup>R</sup>                                           | this work                     |
| YC529              | <i>amyE</i> ::P <sub><i>yqxM</i></sub> - <i>lacZ</i> , $\Delta$ <i>ywcC</i> , $\Delta$ <i>slrR</i> , $\Delta$ <i>epsH</i> in 3610, Cm <sup>R</sup> , Kan <sup>R</sup> , Mls <sup>R</sup> , Tet <sup>R</sup> | this work                     |
| YC530              | $\Delta$ <i>ywcC</i> - <i>slrA</i> , $\Delta$ <i>slrR</i> in 3610, Kan <sup>R</sup> , Mls <sup>R</sup>                                                                                                      | this work                     |
| YC531              | <i>amyE</i> ::P <sub><i>slrR</i></sub> - <i>lacZ</i> , $\Delta$ <i>ywcC</i> - <i>slrA</i> , $\Delta$ <i>slrR</i> in 3610, Cm <sup>R</sup> , Kan <sup>R</sup> , Mls <sup>R</sup>                             | this work                     |
| YC540              | <i>amyE</i> ::P <sub><i>yqxM</i></sub> - <i>cfp</i> , $\Delta$ <i>ywcC</i> , $\Delta$ <i>epsH</i> in 3610, Spc <sup>R</sup> , Kan <sup>R</sup> , Tet <sup>R</sup>                                           | this work                     |
| YC563              | <i>amyE</i> ::P <sub><i>slrA</i></sub> - <i>slrA</i> , $\Delta$ <i>slrA</i> in 3610, Cm <sup>R</sup> , Kan <sup>R</sup>                                                                                     | this work                     |
| YC564              | <i>amyE</i> ::P <sub><i>slrA</i></sub> - <i>sinI</i> , $\Delta$ <i>slrA</i> in 3610, Cm <sup>R</sup> , Kan <sup>R</sup>                                                                                     | this work                     |
| YC567              | <i>amyE</i> ::P <sub><i>slrA</i></sub> - <i>gfp</i> in 3610, Cm <sup>R</sup>                                                                                                                                | this work                     |
| YC568              | <i>amyE</i> ::P <sub><i>yqxM</i></sub> - <i>lacZ</i> , $\Delta$ <i>sinR</i> , $\Delta$ <i>slrA</i> , $\Delta$ <i>epsH</i> in 3610, Cm <sup>R</sup> , Spc <sup>R</sup> , Kan <sup>R</sup> , Tet <sup>R</sup> | this work                     |
| YC569              | <i>amyE</i> ::P <sub><i>epsA</i></sub> - <i>lacZ</i> , $\Delta$ <i>sinR</i> , $\Delta$ <i>slrA</i> , $\Delta$ <i>epsH</i> in 3610, Cm <sup>R</sup> , Spc <sup>R</sup> , Kan <sup>R</sup> , Tet <sup>R</sup> | this work                     |

---

**Table S2. Primes used in this study.**

---

|                              |                                                      |
|------------------------------|------------------------------------------------------|
| <i>P<sub>slrA</sub></i> -F1: | 5'- <u>gtagaattccctggcg</u> gtaatgattaccctt-3'       |
| <i>P<sub>slrA</sub></i> -R1: | 5'-gtaggatccaattgtataaaatgttttcctg-3'                |
| <i>P<sub>slrA</sub></i> -R2: | 5'-gtacatatgaacctccaattgtataaaatgt-3'                |
| <i>P<sub>slrR</sub></i> -F1: | 5'-gtagaattcctagacaatcgcatataattccttg-3'             |
| <i>P<sub>slrR</sub></i> -R1: | 5'-gtcggatcccctagaaattctcctctattcctgtcg-3'           |
| <i>P<sub>epsA</sub></i> -F1: | 5'-gtcgaattcctagaaattctcctctattcctgtcg-3'            |
| <i>P<sub>epsA</sub></i> -R1: | 5'-gtcgaattcctagacaatcgcatataattccttg-3'             |
| <i>sinI</i> -F2:             | 5'-gtacatatgaagaatgcaaaacaagagcac-3'                 |
| <i>sinI</i> -R2:             | 5'-gtaggatccctcagaaaggatttacggtatg-3'                |
| <i>slrA</i> -R1:             | 5'-gtaggatccctagtcttgccggacggttttt-3'                |
| <i>ywcC</i> -P1:             | 5'-gacgccgataaaatgggttttccg-3'                       |
| <i>ywcC</i> -P2:             | 5'-caattcgccctatagtgagtcgttcagtgaaagtatagagaaata-3'  |
| <i>ywcC</i> -P3:             | 5'-ccagcttttgttcccttttagtgagatttttctcctggcggaatg-3'  |
| <i>ywcC</i> -P4:             | 5'-caataaaagcgcgctttctgctt -3'                       |
| <i>slrA</i> -P1:             | 5'-gagagtgcgtctaaaaagctgcg-3'                        |
| <i>slrA</i> -P2:             | 5'-caattcgccctatagtgagtcgttcatagtaacctccaattgta-3'   |
| <i>slrA</i> -P3:             | 5'-ccagcttttgttcccttttagtgagaagactagtccgaacaggcgg-3' |
| <i>slrA</i> -P4:             | 5'-gatgtacaagacaacgagataag -3'                       |

---
